# Supplementary material
Source: Springer Nature journal article supplement (https://www.springermedizin.de/resource/supplementary/12968_2013_3337_MOESM5_ESM.pdf/9583652)

Before correction

GRE vs. SSFP (ED)

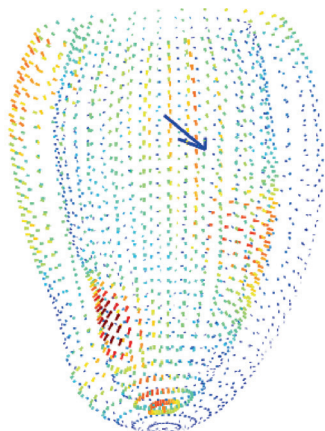

2 mm

0

10 mm

GRE vs. SSFP (ES)

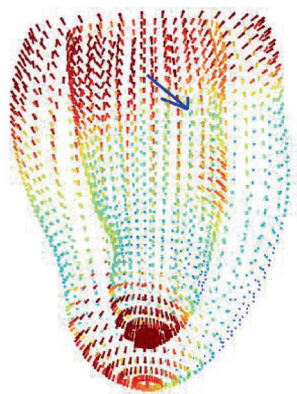

After correction

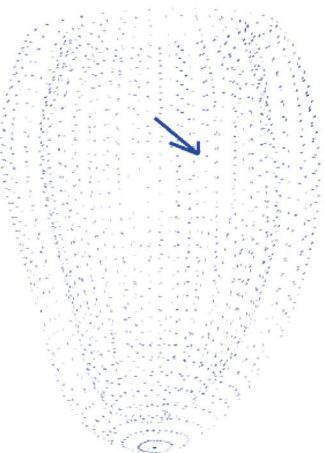

2 mm

0

10 mm

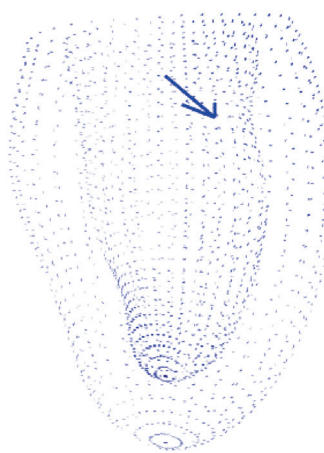

Supplement: MOESM5 [file 9583652]
